# Supplementary material for: Computer-aided bimetallic catalyst screening for ester selective hydrogenation
Source: Royal Society of Chemistry journal article supplement (doi:10.1039/d2cy00149g), 2022-01-01
Supplement: d2cy00149g1.pdf [file d2cy00149g1.pdf]

# SUPPORTING INFORMATION

## Computer-Aided Bimetallic Catalyst Screening for Ester Selective Hydrogenation

*Wei-Qi Yan*<sup>†</sup>, *Rui-Jia Zhou*<sup>†</sup>, *Li-Jun Jing*<sup>†</sup>, *Yue-Qiang Cao*<sup>†</sup>, *Jing-Hong Zhou*<sup>†</sup>, *Zhi-Jun Sui*<sup>†</sup>, *Wei Li*<sup>†</sup>,  
*De Chen*<sup>‡</sup>, *Xing-Gui Zhou*<sup>†</sup>, *Yi-An Zhu*<sup>†,\*</sup>

<sup>†</sup>UNILAB, State Key Laboratory of Chemical Engineering, School of Chemical Engineering, East China University of Science and Technology, Shanghai 200237, China

<sup>‡</sup>Department of Chemical Engineering, Norwegian University of Science and Technology, N-7491 Trondheim, Norway

---

\* Corresponding author: [yanzhu@ecust.edu.cn](mailto:yanzhu@ecust.edu.cn) (Yi-An Zhu)

## 1. The formation energy approach

Hence, the formation energy of species  $C_xH_yO_z$  is defined as

$$E_{C_xH_yO_z} = E_{surf+C_xH_yO_z} - E_{surf} - (xE_C + yE_H + zE_O) \quad (S1)$$

where  $E_{surf+C_xH_yO_z}$  is the total energy of the surface with adsorbate,  $E_{surf}$  is the total energy of the clean surface,

$E_C$  is calculated as  $E_{CH_4(g)} - 2E_{H_2(g)}$ ,  $E_H$  is calculated as  $0.5E_{H_2(g)}$ , and  $E_O$  is calculated as  $E_{H_2O(g)} - E_{H_2(g)}$ .

## 2. Scaling relations of transition states

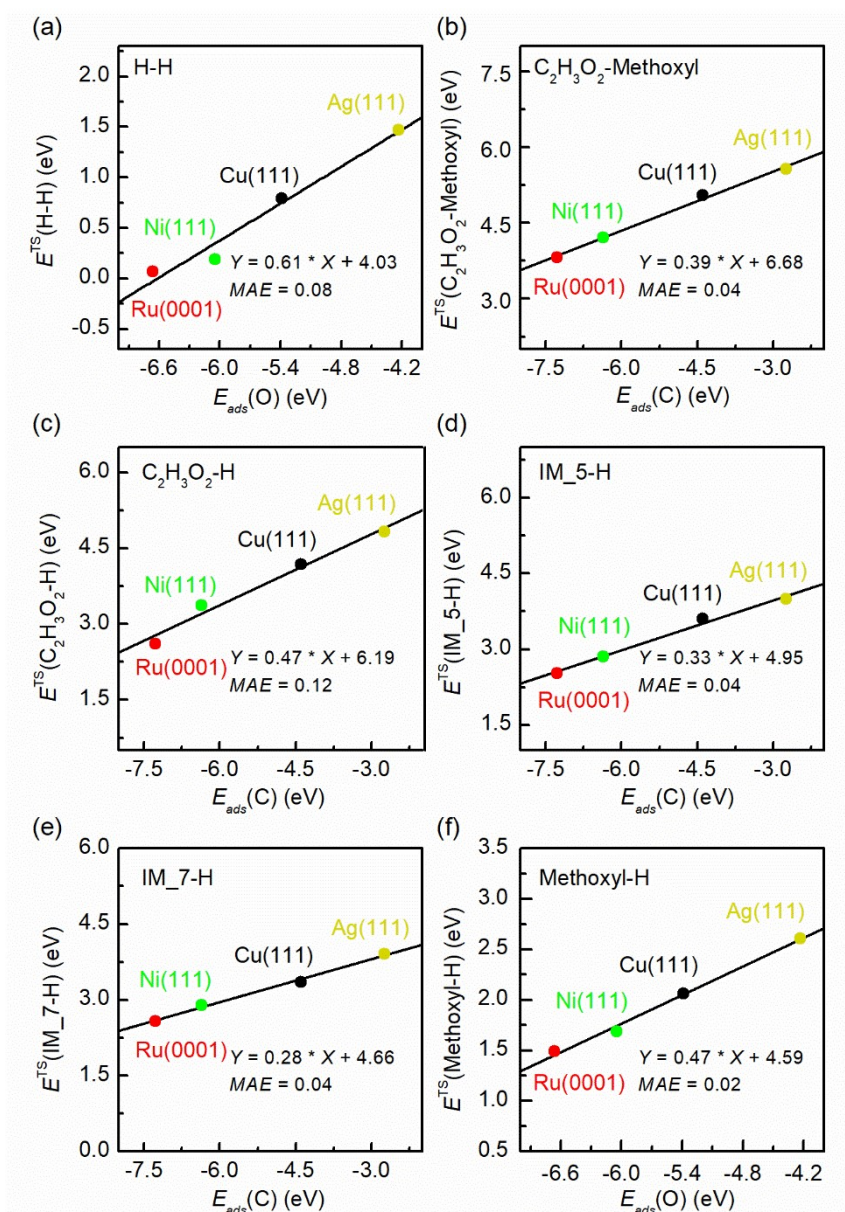

**Figure S1** Calculated adsorption energies of transition states as a function of the adsorption energy of atomic carbon or oxygen.

### 3. Scaling relations of *bimetallic catalysts and elemental metals*

To see if the established scaling relations can be applied to the *d*-block&*d*-block (*d&d*), *d*-block&*s*-block (*d&s*) and *d*-block&*p*-block (*d&p*) bimetallic catalysts, the formation energies of acyl(1) over  $\text{Ag}_3\text{Zn}_1(111)$ ,  $\text{Ag}_3\text{Sn}_1(111)$ ,  $\text{Ag}_3\text{Mg}_1(111)$ ,  $\text{Cu}_3\text{Ni}_1(111)$  and  $\text{Cu}_3\text{Mg}_1(111)$  have been calculated and plotted in in Figure S3, where the black straight lines indicate the scaling relations obtained by making linear regressions on the 4 elemental metals. From the figure, one can see that the data fit the scaling relations quite well, and the formation energies of atomic C and O are only needed to predict the catalytic performance of bimetallic catalysts.

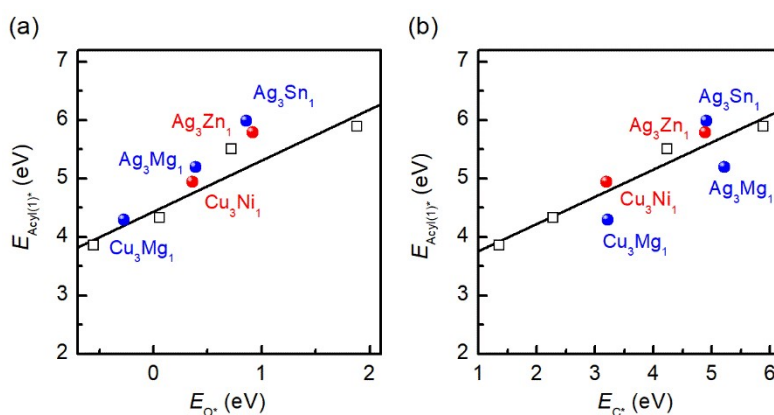

**Figure S2** Calculated formation energies of acyl(1) as a function of the formation energies of (a) atomic carbon or oxygen on *d&d* (red spheres), *d&s* and *d&p* (blue spheres) bimetallic catalysts and elemental metals (black squares); the black straight lines indicate the scaling relations obtained by making linear regressions on the 4 elemental metals.

#### 4, Shomate parameters of gas-phase species calculated by ASPEN PLUS V9

Table S1. Shomate parameters of gas-phase species

|   | DMO     | MG      | EG      |
|---|---------|---------|---------|
| A | 71.88   | -12.97  | -18.03  |
| B | 165.54  | 467.00  | 368.90  |
| C | 149.63  | -392.94 | -286.98 |
| D | -145.11 | 137.78  | 94.89   |
| E | 0.46    | 0.79    | 0.91    |
| F | -28.30  | -11.18  | -5.63   |
| G | 518.83  | 242.16  | 190.05  |
| H | 0.00    | 0.00    | 0.00    |

## 5. The details of clustering algorithm

The bimetallic catalysts are all composed of two elements among the 39 selected elements as shown in Figure S2. The clustering algorithm used in this work is a bisecting k-means clustering algorithm, which can overcome the problem of poor clusters arising from k-means getting caught in a local minimum. Since the optimization process is a dynamic iterative process moving from the unreasonable partition to the "optimal" partition, this method is taken as a dynamic clustering method. Bisecting k-means clustering algorithm starts out with one cluster and then splits the cluster in two. After that, it chooses a cluster to split. The cluster to split is determined by minimizing the sum of squared error (SSE). This splitting based on the SSE is repeated until the user-defined number of clusters is attained. The process of clustering is as follows. First, all the data points start with one cluster. Although the number of clusters is less than k (k is the user-defined number of clusters to be divided), for every cluster, it measures total error and performs k-means clustering with k=2 on the given cluster (k-means clustering will split the cluster in two). Then, it chooses the cluster split that gives the lowest error and commits this split. Finally, the calculation stops until the number of clusters equals k.

The figure shows a periodic table with 39 elements highlighted in yellow. These elements are: H, Li, Na, K, Rb, Cs, Fr, Be, Mg, Ca, Sr, Ba, Ra, Sc, Y, La, Ac, Ti, Zr, Hf, Rf, V, Nb, Ta, Db, Cr, Mo, W, Sg, Mn, Tc, Re, Bh, Fe, Ru, Os, Hs, Co, Rh, Ir, Pt, Ds, Ni, Pd, Ag, Au, Cu, Zn, Cd, Hg, Uut, Ga, In, Tl, Uup, Ge, Sn, Pb, Fl, As, Sb, Bi, Uuo, Se, Te, Po, Lv, Br, I, At, Uus, Kr, Xe, Rn, and Uuo. A legend indicates that the yellow color represents the 'Atomic Number' and 'Electron Configuration' for the element 'Cr' (Chromium), which has an atomic number of 24 and an electron configuration of 3d<sup>5</sup> 4s<sup>1</sup>.

**Figure S3.** Constituent elements of the alloys of interest, which are colored yellow in the periodic table.

## 6. Summary of calculated data for screening for bimetallic catalysts

**Table S2.** Summary of calculated data for screening for alloy catalysts.

| Alloy  | C [eV] | O [eV] | cost [\$ per kg] |
|--------|--------|--------|------------------|
| Ag3Al1 | 5.84   | -0.36  | 939.5            |
| Ag3As1 | 3.71   | 1.00   | 1700             |
| Ag3Au1 | 5.12   | 1.88   | 14750            |
| Ag3Bi1 | 5.36   | 1.42   | 997.5            |
| Ag3Ca1 | 4.91   | -0.02  | 950              |
| Ag3Cd1 | 5.55   | 1.37   | 1015             |
| Ag3Ga1 | 5.80   | 0.51   | 1450             |
| Ag3Ge1 | 5.69   | 0.56   | 1800             |
| Ag3In1 | 5.26   | 1.02   | 3320             |
| Ag3Mg1 | 5.22   | 0.39   | 909.25           |
| Ag3P1  | 5.37   | -0.54  | 975              |
| Ag3Pd1 | 4.52   | 1.77   | 15482.5          |
| Ag3Pt1 | 3.74   | 1.55   | 33400            |
| Ag3Sb1 | 5.01   | 1.14   | 911.25           |
| Ag3Sn1 | 4.91   | 0.86   | 960              |
| Ag3Y1  | 4.13   | -1.15  | 1007.5           |
| Ag3Zn1 | 4.89   | 0.92   | 913.25           |
| Al3Au1 | 2.13   | -2.51  | 13968.5          |
| Al3Ca1 | 1.53   | -2.42  | 168.5            |
| Al3Co1 | 3.49   | -1.88  | 171              |
| Al3Cr1 | 2.57   | -1.83  | 198.5            |
| Al3Cu1 | 2.33   | -2.33  | 143              |
| Al3Fe1 | 3.47   | -1.90  | 136.5            |
| Al3Ga1 | 2.29   | -2.21  | 668.5            |
| Al3Ge1 | 2.38   | -2.32  | 1018.5           |
| Al3Hf1 | 2.63   | -2.04  | 418.5            |
| Al3Ir1 | 3.57   | -2.06  | 10618.5          |
| Al3La1 | 1.94   | -2.24  | 318.5            |
| Al3Mg1 | 2.68   | -2.37  | 127.75           |
| Al3Mn1 | 3.20   | -1.56  | 134.75           |
| Al3Mo1 | 2.82   | -1.93  | 228.5            |
| Al3Nb1 | 2.72   | -1.43  | 163.5            |
| Al3Ni1 | 2.75   | -2.12  | 137.75           |
| Al3Os1 | 3.84   | -2.11  | 19368.5          |
| Al3Pd1 | 2.43   | -2.22  | 14701            |
| Al3Pt1 | 2.67   | -2.41  | 32618.5          |
| Al3Re1 | 2.20   | -1.96  | 4118.5           |
| Al3Rh1 | 3.42   | -1.96  | 32618.5          |
| Al3Ru1 | 3.48   | -2.02  | 3618.5           |
| Al3Sc1 | 2.98   | -2.42  | 468.5            |

|        |      |       |          |
|--------|------|-------|----------|
| Al3Si1 | 2.42 | -2.42 | 132      |
| Al3Ta1 | 2.49 | -1.55 | 1243.5   |
| Al3Ti1 | 2.66 | -1.96 | 283.75   |
| Al3V1  | 2.53 | -1.54 | 668.5    |
| Al3W1  | 1.47 | -1.78 | 146      |
| Al3Y1  | 2.59 | -1.53 | 226      |
| Al3Zn1 | 2.54 | -2.35 | 131.75   |
| Al3Zr1 | 2.83 | -1.88 | 511      |
| Au3Ag1 | 4.44 | 2.10  | 41850    |
| Au3Bi1 | 4.20 | 1.36  | 41647.5  |
| Au3Ca1 | 3.77 | 0.72  | 41600    |
| Au3Cd1 | 4.62 | 1.70  | 41665    |
| Au3Cu1 | 4.49 | 1.69  | 41574.5  |
| Au3Ge1 | 4.11 | 1.08  | 42450    |
| Au3In1 | 4.47 | 1.44  | 43970    |
| Au3Mg1 | 4.59 | 0.96  | 41559.25 |
| Au3Mn1 | 3.99 | 0.84  | 41566.25 |
| Au3Pb1 | 3.96 | 1.50  | 41556.25 |
| Au3Pd1 | 4.04 | 2.21  | 56132.5  |
| Au3Pt1 | 3.41 | 1.97  | 74050    |
| Au3Sb1 | 4.31 | 1.18  | 41561.25 |
| Au3Sc1 | 3.97 | -0.79 | 41900    |
| Au3Sn1 | 4.26 | 1.26  | 41610    |
| Au3Sr1 | 2.90 | -0.36 | 41800    |
| Au3Ti1 | 2.65 | -2.05 | 41715.25 |
| Au3Y1  | 4.00 | -0.41 | 41657.5  |
| Au3Zn1 | 4.58 | 1.30  | 41563.25 |
| Ba3Pb1 | 2.03 | -2.91 | 418.75   |
| Ba3Sn1 | 1.88 | -2.84 | 472.5    |
| Bi3Ba1 | 4.52 | -0.02 | 430      |
| Bi3Ca1 | 4.49 | 0.05  | 342.5    |
| Bi3Cd1 | 3.38 | -0.40 | 407.5    |
| Bi3Ga1 | 4.64 | 0.77  | 842.5    |
| Bi3In1 | 4.51 | 0.00  | 2712.5   |
| Bi3La1 | 4.29 | -0.31 | 492.5    |
| Bi3Sc1 | 3.87 | -1.40 | 642.5    |
| Bi3Sr1 | 4.59 | 0.17  | 542.5    |
| Bi3Tl1 | 4.42 | 0.40  | 412.5    |
| Bi3Y1  | 4.16 | -0.60 | 400      |
| Ca3Al1 | 4.00 | -3.51 | 189.5    |
| Ca3Cd1 | 3.53 | -3.83 | 265      |
| Ca3Pb1 | 4.01 | -3.82 | 156.25   |
| Ca3Sn1 | 4.07 | -3.79 | 210      |
| Cd3Ag1 | 5.32 | 0.67  | 645      |
| Cd3Au1 | 5.31 | 0.59  | 14195    |
| Cd3Bi1 | 3.96 | 0.33  | 442.5    |



|        |       |       |         |
|--------|-------|-------|---------|
| Cd3Ca1 | 3.88  | -0.67 | 395     |
| Cd3Ga1 | 5.22  | 0.17  | 895     |
| Cd3Hf1 | 2.78  | -2.40 | 645     |
| Cd3Hg1 | 5.41  | 0.45  | 465     |
| Cd3Mg1 | 5.45  | -0.41 | 354.25  |
| Cd3Pb1 | 4.22  | 0.26  | 351.25  |
| Cd3Pd1 | 4.97  | 0.84  | 14927.5 |
| Cd3Pt1 | 4.26  | 0.87  | 32845   |
| Cd3Rh1 | 3.67  | 0.93  | 32845   |
| Cd3Sc1 | 3.75  | -1.70 | 695     |
| Cd3Sn1 | 4.77  | 0.37  | 405     |
| Cd3Ti1 | 2.81  | -2.07 | 510.25  |
| Cd3Y1  | 3.87  | -1.50 | 452.5   |
| Cd3Zn1 | 5.40  | 0.24  | 358.25  |
| Cd3Zr1 | 2.93  | -1.99 | 737.5   |
| Co3Al1 | 1.69  | -0.67 | 197     |
| Co3As1 | 2.19  | -0.41 | 957.5   |
| Co3Cr1 | 0.89  | -2.24 | 237.5   |
| Co3Fe1 | 1.92  | -0.54 | 175.5   |
| Co3Ga1 | 1.98  | -0.30 | 707.5   |
| Co3Ge1 | 2.14  | -0.25 | 1057.5  |
| Co3Hf1 | 0.66  | -1.51 | 457.5   |
| Co3Ir1 | 1.81  | -0.13 | 10657.5 |
| Co3Mo1 | 1.47  | -1.10 | 267.5   |
| Co3Nb1 | 1.14  | -1.19 | 202.5   |
| Co3Ni1 | 2.15  | -0.37 | 176.75  |
| Co3P1  | 1.18  | -1.37 | 232.5   |
| Co3Pt1 | 2.29  | -0.24 | 32657.5 |
| Co3Rh1 | 2.02  | -0.31 | 32657.5 |
| Co3Sb1 | 2.16  | -0.19 | 168.75  |
| Co3Sc1 | 0.55  | -1.58 | 507.5   |
| Co3Si1 | 2.10  | -0.36 | 171     |
| Co3Ta1 | 1.24  | -1.33 | 1282.5  |
| Co3Ti1 | 1.04  | -1.41 | 322.75  |
| Co3V1  | 1.55  | -1.23 | 707.5   |
| Co3W1  | 1.48  | -1.45 | 185     |
| Co3Zr1 | 0.58  | -1.45 | 550     |
| Cr3Al1 | 0.91  | -2.00 | 279.5   |
| Cr3As1 | 1.44  | -2.12 | 1040    |
| Cr3Co1 | 0.58  | -2.63 | 292.5   |
| Cr3Cu1 | 0.98  | -2.63 | 264.5   |
| Cr3Fe1 | -0.60 | -3.26 | 258     |
| Cr3Ga1 | 1.39  | -2.02 | 790     |
| Cr3Ge1 | 1.83  | -1.98 | 1140    |
| Cr3Ir1 | 0.83  | -2.27 | 10740   |
| Cr3Mn1 | -1.39 | -4.17 | 256.25  |

|        |       |       |         |
|--------|-------|-------|---------|
| Cr3Mo1 | -3.41 | -5.06 | 350     |
| Cr3Ni1 | 0.80  | -2.24 | 259.25  |
| Cr3Os1 | 0.24  | -2.49 | 19490   |
| Cr3P1  | 1.60  | -2.06 | 315     |
| Cr3Pd1 | 0.61  | -2.86 | 14822.5 |
| Cr3Pt1 | 0.97  | -2.32 | 32740   |
| Cr3Re1 | -0.95 | -3.32 | 4240    |
| Cr3Rh1 | 0.56  | -2.60 | 32740   |
| Cr3Ru1 | 0.16  | -2.71 | 3740    |
| Cr3Si1 | 1.80  | -1.94 | 253.5   |
| Cr3V1  | 0.89  | -2.49 | 790     |
| Cr3W1  | -0.88 | -2.25 | 267.5   |
| Cr3Zn1 | 1.03  | -2.46 | 253.25  |
| Cu3Al1 | 3.80  | -0.49 | 113     |
| Cu3As1 | 3.31  | 0.69  | 873.5   |
| Cu3Au1 | 4.08  | 0.60  | 13923.5 |
| Cu3Ga1 | 4.06  | 0.24  | 623.5   |
| Cu3Ge1 | 3.95  | 0.40  | 973.5   |
| Cu3In1 | 3.74  | 0.44  | 2493.5  |
| Cu3Mg1 | 3.22  | -0.27 | 82.75   |
| Cu3Ni1 | 3.20  | 0.36  | 92.75   |
| Cu3P1  | 2.53  | 0.15  | 148.5   |
| Cu3Pd1 | 3.66  | 0.61  | 14656   |
| Cu3Pt1 | 3.31  | 0.78  | 32573.5 |
| Cu3Rh1 | 2.58  | 0.55  | 32573.5 |
| Cu3Sc1 | 3.09  | -1.47 | 423.5   |
| Cu3Si1 | 3.15  | -0.42 | 87      |
| Cu3Sn1 | 4.39  | 0.51  | 133.5   |
| Cu3Zn1 | 4.06  | 0.46  | 86.75   |
| Fe3Al1 | 1.64  | -1.27 | 93.5    |
| Fe3As1 | 2.45  | -0.73 | 854     |
| Fe3Co1 | 1.07  | -1.19 | 106.5   |
| Fe3Cr1 | 1.60  | -1.46 | 134     |
| Fe3Cu1 | 1.78  | -1.07 | 78.5    |
| Fe3Ga1 | 1.87  | -0.66 | 604     |
| Fe3Ge1 | 2.41  | -0.52 | 954     |
| Fe3Hf1 | -0.03 | -2.54 | 354     |
| Fe3In1 | 1.80  | -0.74 | 2474    |
| Fe3Ir1 | 1.67  | -0.86 | 10554   |
| Fe3Mo1 | 1.43  | -1.36 | 164     |
| Fe3Nb1 | 0.55  | -1.87 | 99      |
| Fe3Ni1 | 1.91  | -0.81 | 73.25   |
| Fe3P1  | 2.40  | -0.71 | 129     |
| Fe3Pd1 | 1.70  | -1.07 | 14636.5 |
| Fe3Pt1 | 2.06  | -0.96 | 32554   |
| Fe3Re1 | 1.68  | -0.77 | 4054    |

|        |      |       |         |
|--------|------|-------|---------|
| Fe3Rh1 | 1.47 | -1.01 | 32554   |
| Fe3Sb1 | 2.53 | -0.51 | 65.25   |
| Fe3Sc1 | 0.26 | -2.38 | 404     |
| Fe3Si1 | 2.33 | -0.62 | 67.5    |
| Fe3Sn1 | 2.31 | -0.44 | 114     |
| Fe3Ta1 | 0.52 | -1.98 | 1179    |
| Fe3Ti1 | 0.11 | -2.48 | 219.25  |
| Fe3V1  | 1.13 | -1.71 | 604     |
| Fe3W1  | 1.46 | -1.45 | 81.5    |
| Fe3Zn1 | 1.61 | -0.98 | 67.25   |
| Fe3Zr1 | 0.16 | -2.07 | 446.5   |
| Ga3Ag1 | 3.41 | -0.01 | 1950    |
| Ga3Al1 | 3.34 | -0.94 | 1689.5  |
| Ga3Ca1 | 2.92 | -0.29 | 1700    |
| Ga3Cd1 | 3.40 | -0.13 | 1765    |
| Ga3Ge1 | 3.64 | -0.52 | 2550    |
| Ga3Hf1 | 3.09 | -0.78 | 1950    |
| Ga3La1 | 3.17 | -1.20 | 1850    |
| Ga3Mg1 | 4.02 | -0.92 | 1659.25 |
| Ga3Mn1 | 3.46 | -0.30 | 1666.25 |
| Ga3Nb1 | 3.21 | -0.09 | 1695    |
| Ga3Sb1 | 3.88 | -0.25 | 1661.25 |
| Ga3Sc1 | 3.53 | -1.09 | 2000    |
| Ga3Ta1 | 2.94 | -0.27 | 2775    |
| Ga3Ti1 | 3.19 | -0.49 | 1815.25 |
| Ga3V1  | 3.05 | -0.15 | 2200    |
| Ga3Y1  | 3.63 | -1.09 | 1757.5  |
| Ga3Zn1 | 3.81 | -0.23 | 1663.25 |
| Ga3Zr1 | 3.33 | -0.46 | 2042.5  |
| Ge3Ag1 | 3.96 | 0.10  | 3000    |
| Ge3Ca1 | 3.60 | -0.47 | 2750    |
| Ge3Cd1 | 3.34 | -0.38 | 2815    |
| Ge3Ga1 | 3.87 | 0.15  | 3250    |
| Ge3Hf1 | 2.66 | -1.56 | 3000    |
| Ge3In1 | 3.82 | -0.17 | 5120    |
| Ge3La1 | 3.77 | -0.33 | 2900    |
| Ge3Mg1 | 3.32 | -0.70 | 2709.25 |
| Ge3Sc1 | 3.52 | -0.40 | 3050    |
| Ge3Sn1 | 3.65 | -0.02 | 2760    |
| Ge3Sr1 | 3.50 | -0.50 | 2950    |
| Ge3Ti1 | 2.84 | -1.51 | 2865.25 |
| Ge3Y1  | 3.56 | -0.45 | 2807.5  |
| Ge3Zr1 | 3.03 | -0.65 | 3092.5  |
| Hf3Al1 | 1.00 | -3.91 | 939.5   |
| Hf3As1 | 0.94 | -3.79 | 1700    |
| Hf3Au1 | 0.81 | -4.12 | 14750   |

|        |       |       |         |
|--------|-------|-------|---------|
| Hf3Bi1 | 0.98  | -3.77 | 997.5   |
| Hf3Cd1 | 0.86  | -4.09 | 1015    |
| Hf3Cu1 | 0.86  | -3.92 | 924.5   |
| Hf3Ga1 | 0.98  | -3.91 | 1450    |
| Hf3Ge1 | 1.07  | -3.79 | 1800    |
| Hf3Hg1 | 0.82  | -4.12 | 1020    |
| Hf3In1 | 0.70  | -4.03 | 3320    |
| Hf3Ir1 | -1.10 | -6.34 | 11400   |
| Hf3Mo1 | -0.86 | -5.06 | 1010    |
| Hf3Nb1 | 0.52  | -4.14 | 945     |
| Hf3Os1 | -0.08 | -4.97 | 20150   |
| Hf3Pb1 | 0.82  | -3.85 | 906.25  |
| Hf3Pd1 | -0.23 | -5.14 | 15482.5 |
| Hf3Pt1 | -0.33 | -5.33 | 33400   |
| Hf3Re1 | 1.00  | -3.93 | 4900    |
| Hf3Rh1 | -1.48 | -6.55 | 33400   |
| Hf3Ru1 | -2.23 | -7.03 | 4400    |
| Hf3Sb1 | 1.04  | -3.75 | 911.25  |
| Hf3Sc1 | 0.43  | -3.95 | 1250    |
| Hf3Si1 | 1.19  | -3.76 | 913.5   |
| Hf3Sn1 | 0.93  | -3.81 | 960     |
| Hf3Ta1 | 0.45  | -4.07 | 2025    |
| Hf3Ti1 | 0.89  | -3.96 | 1065.25 |
| Hf3Tl1 | 0.60  | -4.08 | 1020    |
| Hf3Zn1 | 1.06  | -3.98 | 913.25  |
| Hf3Zr1 | 0.59  | -3.98 | 1292.5  |
| Hg3In1 | 6.03  | 2.31  | 2780    |
| Hg3La1 | 3.94  | -1.45 | 560     |
| Hg3Sc1 | 5.64  | -1.46 | 710     |
| Hg3Y1  | 4.16  | -1.10 | 467.5   |
| In3Ag1 | 4.73  | 0.35  | 7560    |
| In3Bi1 | 4.62  | 0.26  | 7357.5  |
| In3Ca1 | 4.54  | -0.77 | 7310    |
| In3Cd1 | 4.64  | 0.20  | 7375    |
| In3Ga1 | 4.69  | 0.03  | 7810    |
| In3Ge1 | 4.02  | -0.07 | 8160    |
| In3Hf1 | 3.11  | -1.13 | 7560    |
| In3La1 | 3.98  | -1.12 | 7460    |
| In3Mg1 | 4.79  | -0.69 | 7269.25 |
| In3Sb1 | 4.32  | 0.25  | 7271.25 |
| In3Sc1 | 3.76  | -1.05 | 7610    |
| In3Sn1 | 4.37  | 0.09  | 7320    |
| In3Sr1 | 4.27  | -0.73 | 7510    |
| In3Ti1 | 3.08  | -1.16 | 7425.25 |
| In3Y1  | 3.98  | -0.95 | 7367.5  |
| In3Zr1 | 3.42  | -0.61 | 7652.5  |

|        |       |       |          |
|--------|-------|-------|----------|
| Ir3Al1 | 1.10  | -0.28 | 31539.5  |
| Ir3As1 | -0.70 | -1.73 | 32300    |
| Ir3Cr1 | 1.68  | -0.33 | 31580    |
| Ir3Fe1 | 0.81  | -0.35 | 31518    |
| Ir3Ga1 | 1.09  | 0.17  | 32050    |
| Ir3Ge1 | 0.26  | -0.80 | 32400    |
| Ir3Hf1 | 0.57  | -0.80 | 31800    |
| Ir3Mg1 | 0.74  | -0.24 | 31509.25 |
| Ir3Mn1 | 1.22  | -0.02 | 31516.25 |
| Ir3Mo1 | 1.81  | -0.31 | 31610    |
| Ir3Nb1 | 1.08  | -0.66 | 31545    |
| Ir3Os1 | 1.46  | 0.21  | 50750    |
| Ir3Re1 | 1.58  | -0.12 | 35500    |
| Ir3Rh1 | 1.35  | 0.33  | 64000    |
| Ir3Ru1 | 1.54  | 0.20  | 35000    |
| Ir3Sb1 | 1.18  | 0.46  | 31511.25 |
| Ir3Sc1 | 0.59  | -0.75 | 31850    |
| Ir3Si1 | -1.11 | -2.48 | 31513.5  |
| Ir3Sn1 | 1.13  | 0.32  | 31560    |
| Ir3Ta1 | 1.14  | -0.81 | 32625    |
| Ir3Ti1 | 0.81  | -0.71 | 31665.25 |
| Ir3V1  | 1.35  | -0.62 | 32050    |
| Ir3W1  | 1.81  | -1.23 | 31527.5  |
| Ir3Y1  | 0.15  | -0.88 | 31607.5  |
| Ir3Zn1 | 1.05  | 0.09  | 31513.25 |
| Ir3Zr1 | 0.44  | -0.78 | 31892.5  |
| La3Al1 | 2.10  | -3.30 | 639.5    |
| La3Bi1 | 1.58  | -3.56 | 697.5    |
| La3Cd1 | 1.59  | -3.54 | 715      |
| La3Ga1 | 2.04  | -3.32 | 1150     |
| La3Ge1 | 1.94  | -3.35 | 1500     |
| La3Hg1 | 1.44  | -3.74 | 720      |
| La3In1 | 1.82  | -3.46 | 3020     |
| La3Mg1 | 1.68  | -3.44 | 609.25   |
| La3Pb1 | 1.67  | -3.52 | 606.25   |
| La3Sb1 | 1.72  | -3.49 | 611.25   |
| La3Si1 | 2.05  | -3.30 | 613.5    |
| La3Sn1 | 1.81  | -3.45 | 660      |
| La3Tl1 | 1.70  | -3.52 | 720      |
| Mg3Ag1 | 4.52  | -2.36 | 327.75   |
| Mg3Au1 | 4.62  | -2.37 | 13877.75 |
| Mg3Bi1 | 4.44  | -2.78 | 125.25   |
| Mg3Cu1 | 4.65  | -2.31 | 52.25    |
| Mg3Ge1 | 4.49  | -2.63 | 927.75   |
| Mg3Ir1 | 5.18  | -1.86 | 10527.75 |
| Mg3Ni1 | 4.67  | -2.17 | 47       |

|        |       |       |          |
|--------|-------|-------|----------|
| Mg3Pb1 | 4.64  | -2.59 | 34       |
| Mg3Pd1 | 4.61  | -2.23 | 14610.25 |
| Mg3Pt1 | 4.79  | -2.18 | 32527.75 |
| Mg3Rh1 | 4.85  | -2.03 | 32527.75 |
| Mg3Ru1 | 2.24  | -1.77 | 3527.75  |
| Mg3Sb1 | 4.26  | -2.94 | 39       |
| Mg3Sc1 | 2.83  | -3.29 | 377.75   |
| Mg3Si1 | 4.60  | -2.62 | 41.25    |
| Mg3Zn1 | 4.45  | -2.38 | 41       |
| Mg3Zr1 | 1.82  | -3.39 | 420.25   |
| Mn3Co1 | 0.31  | -2.45 | 101.25   |
| Mn3Cr1 | 0.77  | -2.54 | 128.75   |
| Mn3Fe1 | 0.50  | -2.48 | 66.75    |
| Mn3Ga1 | 1.33  | -2.05 | 598.75   |
| Mn3Ge1 | 1.62  | -1.91 | 948.75   |
| Mn3Hf1 | 1.06  | -2.24 | 348.75   |
| Mn3Ir1 | 0.55  | -2.17 | 10548.75 |
| Mn3Mo1 | 0.71  | -2.17 | 158.75   |
| Mn3Nb1 | 1.19  | -1.76 | 93.75    |
| Mn3Ni1 | 1.38  | -2.36 | 68       |
| Mn3Os1 | 0.71  | -2.02 | 19298.75 |
| Mn3P1  | 1.64  | -1.91 | 123.75   |
| Mn3Pt1 | 1.91  | -1.35 | 32548.75 |
| Mn3Re1 | -0.79 | -3.29 | 4048.75  |
| Mn3Rh1 | -0.56 | -3.64 | 32548.75 |
| Mn3Ru1 | 0.20  | -2.27 | 3548.75  |
| Mn3Sb1 | 1.87  | -1.20 | 60       |
| Mn3Sc1 | 0.78  | -2.21 | 398.75   |
| Mn3Si1 | 1.24  | -1.88 | 62.25    |
| Mn3Sn1 | 1.80  | -1.17 | 108.75   |
| Mn3Ta1 | 1.07  | -1.93 | 1173.75  |
| Mn3Ti1 | 0.45  | -2.17 | 214      |
| Mn3V1  | -0.36 | -2.89 | 598.75   |
| Mn3W1  | 0.78  | -1.98 | 76.25    |
| Mn3Zr1 | 1.08  | -2.07 | 441.25   |
| Mo3Al1 | 1.34  | -1.85 | 369.5    |
| Mo3As1 | -1.64 | -4.63 | 1130     |
| Mo3Au1 | 0.79  | -2.32 | 14180    |
| Mo3Co1 | 1.22  | -2.00 | 382.5    |
| Mo3Cr1 | -2.88 | -5.85 | 410      |
| Mo3Cu1 | 0.82  | -2.30 | 354.5    |
| Mo3Fe1 | -0.07 | -2.30 | 348      |
| Mo3Ga1 | 1.36  | -1.84 | 880      |
| Mo3Ge1 | 1.60  | -1.88 | 1230     |
| Mo3In1 | 1.35  | -1.82 | 2750     |
| Mo3Ir1 | 1.38  | -1.94 | 10830    |

|        |       |       |         |
|--------|-------|-------|---------|
| Mo3Mn1 | -0.60 | -3.01 | 346.25  |
| Mo3Nb1 | 0.16  | -2.23 | 375     |
| Mo3Ni1 | 1.13  | -2.17 | 349.25  |
| Mo3Os1 | 1.02  | -2.01 | 19580   |
| Mo3Pd1 | 0.91  | -2.27 | 14912.5 |
| Mo3Pt1 | 1.14  | -2.09 | 32830   |
| Mo3Re1 | -0.25 | -2.56 | 4330    |
| Mo3Rh1 | 1.24  | -2.07 | 32830   |
| Mo3Ru1 | 1.16  | -2.09 | 3830    |
| Mo3Sb1 | 0.87  | -1.84 | 341.25  |
| Mo3Si1 | 1.56  | -1.85 | 343.5   |
| Mo3Sn1 | 1.64  | -1.81 | 390     |
| Mo3Ta1 | 0.62  | -2.35 | 1455    |
| Mo3Ti1 | 0.66  | -2.82 | 495.25  |
| Mo3V1  | 0.03  | -2.71 | 880     |
| Mo3W1  | -2.92 | -6.16 | 357.5   |
| Mo3Zn1 | 0.91  | -2.12 | 343.25  |
| Nb3Al1 | 1.18  | -2.84 | 174.5   |
| Nb3As1 | 0.78  | -2.91 | 935     |
| Nb3Au1 | 0.42  | -3.34 | 13985   |
| Nb3Bi1 | 0.87  | -2.77 | 232.5   |
| Nb3Cd1 | 0.50  | -3.07 | 250     |
| Nb3Cu1 | 0.76  | -3.19 | 159.5   |
| Nb3Fe1 | -0.84 | -4.17 | 153     |
| Nb3Ga1 | 1.18  | -3.00 | 685     |
| Nb3Ge1 | 1.03  | -3.10 | 1035    |
| Nb3Hf1 | -2.02 | -6.19 | 435     |
| Nb3Hg1 | 0.49  | -3.19 | 255     |
| Nb3In1 | 0.90  | -2.75 | 2555    |
| Nb3Ir1 | -0.17 | -3.98 | 10635   |
| Nb3Mg1 | 0.50  | -3.11 | 144.25  |
| Nb3Mo1 | 1.24  | -2.67 | 245     |
| Nb3Ni1 | 0.00  | -3.33 | 154.25  |
| Nb3Os1 | 0.31  | -3.83 | 19385   |
| Nb3P1  | 0.79  | -2.92 | 210     |
| Nb3Pb1 | 1.03  | -2.87 | 141.25  |
| Nb3Pd1 | 0.86  | -2.97 | 14717.5 |
| Nb3Pt1 | 0.54  | -3.15 | 32635   |
| Nb3Rh1 | -0.07 | -3.87 | 32635   |
| Nb3Ru1 | 1.33  | -2.57 | 3635    |
| Nb3Sb1 | 1.04  | -2.74 | 146.25  |
| Nb3Sc1 | 0.55  | -3.85 | 485     |
| Nb3Si1 | 1.44  | -2.58 | 148.5   |
| Nb3Sn1 | 1.12  | -2.82 | 195     |
| Nb3Ta1 | 0.98  | -2.83 | 1260    |
| Nb3Ti1 | 1.01  | -2.96 | 300.25  |

|        |      |       |          |
|--------|------|-------|----------|
| Nb3Ti1 | 0.84 | -2.87 | 255      |
| Nb3V1  | 1.02 | -2.81 | 685      |
| Nb3W1  | 0.90 | -2.67 | 162.5    |
| Nb3Zn1 | 0.90 | -3.07 | 148.25   |
| Ni3Al1 | 2.05 | -0.42 | 97.25    |
| Ni3As1 | 2.85 | 0.25  | 857.75   |
| Ni3Co1 | 2.30 | -0.12 | 110.25   |
| Ni3Cr1 | 2.09 | -0.95 | 137.75   |
| Ni3Cu1 | 1.96 | -0.16 | 82.25    |
| Ni3Fe1 | 2.34 | -0.28 | 75.75    |
| Ni3Ga1 | 2.15 | 0.07  | 607.75   |
| Ni3Ge1 | 2.53 | 0.23  | 957.75   |
| Ni3Hf1 | 2.56 | -1.21 | 357.75   |
| Ni3In1 | 1.88 | -0.03 | 2477.75  |
| Ni3Ir1 | 1.78 | 0.10  | 10557.75 |
| Ni3La1 | 1.57 | -0.29 | 257.75   |
| Ni3Mg1 | 1.70 | -0.61 | 67       |
| Ni3Mn1 | 1.92 | -0.41 | 74       |
| Ni3Mo1 | 2.04 | -1.00 | 167.75   |
| Ni3Nb1 | 2.29 | -1.18 | 102.75   |
| Ni3Pd1 | 2.14 | -0.09 | 14640.25 |
| Ni3Pt1 | 2.24 | 0.10  | 32557.75 |
| Ni3Rh1 | 2.03 | 0.16  | 32557.75 |
| Ni3Sb1 | 2.94 | 0.53  | 69       |
| Ni3Sc1 | 0.97 | -1.11 | 407.75   |
| Ni3Si1 | 2.61 | -0.26 | 71.25    |
| Ni3Sn1 | 2.41 | 0.23  | 117.75   |
| Ni3Ta1 | 2.39 | -1.52 | 1182.75  |
| Ni3Ti1 | 2.27 | -1.20 | 223      |
| Ni3V1  | 2.43 | -1.16 | 607.75   |
| Ni3W1  | 1.89 | -1.39 | 85.25    |
| Ni3Y1  | 1.43 | -1.37 | 165.25   |
| Ni3Zn1 | 1.89 | -0.11 | 71       |
| Ni3Zr1 | 2.58 | -1.08 | 450.25   |
| Os3Cr1 | 1.20 | -1.03 | 57830    |
| Os3Fe1 | 1.36 | -0.59 | 57768    |
| Os3Hf1 | 0.55 | -1.39 | 58050    |
| Os3Ir1 | 1.19 | -0.71 | 68250    |
| Os3Mn1 | 1.23 | -0.74 | 57766.25 |
| Os3Mo1 | 0.89 | -0.94 | 57860    |
| Os3Nb1 | 0.66 | -1.12 | 57795    |
| Os3Re1 | 1.25 | -0.87 | 61750    |
| Os3Rh1 | 1.07 | -0.83 | 90250    |
| Os3Ru1 | 1.02 | -0.87 | 61250    |
| Os3Sc1 | 0.70 | -1.57 | 58100    |
| Os3Ta1 | 0.73 | -1.23 | 58875    |



|        |      |       |          |
|--------|------|-------|----------|
| Os3Ti1 | 0.89 | -1.30 | 57915.25 |
| Os3V1  | 1.05 | -1.17 | 58300    |
| Os3W1  | 0.98 | -1.03 | 57777.5  |
| Os3Zr1 | 0.81 | -1.29 | 58142.5  |
| Pb3Ba1 | 4.82 | -0.03 | 156.25   |
| Pb3Bi1 | 4.88 | 0.32  | 116.25   |
| Pb3Ca1 | 4.65 | -0.29 | 68.75    |
| Pb3Cd1 | 5.02 | 0.53  | 133.75   |
| Pb3Ga1 | 4.20 | 0.19  | 568.75   |
| Pb3Hg1 | 5.01 | 0.44  | 138.75   |
| Pb3In1 | 5.01 | 0.45  | 2438.75  |
| Pb3La1 | 4.13 | -0.67 | 218.75   |
| Pb3Mg1 | 5.18 | -0.54 | 28       |
| Pb3Sb1 | 4.76 | 0.23  | 30       |
| Pb3Sc1 | 3.92 | -1.17 | 368.75   |
| Pb3Sn1 | 4.58 | 0.25  | 78.75    |
| Pb3Sr1 | 4.74 | -0.17 | 268.75   |
| Pb3Tl1 | 4.97 | 0.50  | 138.75   |
| Pb3Y1  | 4.13 | -0.73 | 126.25   |
| Pd3Ag1 | 2.11 | 1.21  | 44047.5  |
| Pd3Al1 | 2.67 | 0.31  | 43787    |
| Pd3Au1 | 2.15 | 1.23  | 57597.5  |
| Pd3Bi1 | 3.70 | 1.31  | 43845    |
| Pd3Ca1 | 2.62 | 0.31  | 43797.5  |
| Pd3Cd1 | 2.29 | 1.31  | 43862.5  |
| Pd3Co1 | 2.48 | 0.61  | 43800    |
| Pd3Cu1 | 2.37 | 1.14  | 43772    |
| Pd3Fe1 | 2.78 | 0.47  | 43765.5  |
| Pd3Ga1 | 2.74 | 0.90  | 44297.5  |
| Pd3Ge1 | 2.38 | 0.20  | 44647.5  |
| Pd3Hf1 | 3.70 | -0.84 | 44047.5  |
| Pd3Hg1 | 2.36 | 1.38  | 43867.5  |
| Pd3In1 | 2.72 | 1.37  | 46167.5  |
| Pd3La1 | 3.12 | -0.17 | 43947.5  |
| Pd3Mg1 | 2.31 | 0.58  | 43756.75 |
| Pd3Mn1 | 2.45 | 0.54  | 43763.75 |
| Pd3Mo1 | 1.99 | -1.53 | 43857.5  |
| Pd3Nb1 | 2.58 | -1.83 | 43792.5  |
| Pd3Ni1 | 2.33 | 0.74  | 43766.75 |
| Pd3Pb1 | 3.25 | 1.42  | 43753.75 |
| Pd3Pt1 | 2.00 | 1.04  | 76247.5  |
| Pd3Sb1 | 3.78 | 1.12  | 43758.75 |
| Pd3Sc1 | 2.52 | -0.25 | 44097.5  |
| Pd3Sn1 | 3.39 | 1.20  | 43807.5  |
| Pd3Ta1 | 2.52 | -2.31 | 44872.5  |
| Pd3Ti1 | 3.27 | -0.89 | 43912.75 |

|        |      |       |          |
|--------|------|-------|----------|
| Pd3Ti1 | 2.72 | 1.61  | 43867.5  |
| Pd3V1  | 2.55 | -1.46 | 44297.5  |
| Pd3Y1  | 2.82 | -0.01 | 43855    |
| Pd3Zn1 | 2.43 | 1.13  | 43760.75 |
| Pd3Zr1 | 3.66 | -0.68 | 44140    |
| Pt3Ag1 | 1.60 | 1.23  | 97800    |
| Pt3Al1 | 2.14 | 0.42  | 97539.5  |
| Pt3Cd1 | 1.68 | 1.10  | 97615    |
| Pt3Co1 | 2.25 | 0.81  | 97552.5  |
| Pt3Cr1 | 2.10 | -0.73 | 97580    |
| Pt3Cu1 | 1.95 | 1.15  | 97524.5  |
| Pt3Fe1 | 2.33 | 0.69  | 97518    |
| Pt3Ga1 | 1.85 | 0.95  | 98050    |
| Pt3Ge1 | 1.24 | 0.02  | 98400    |
| Pt3Hf1 | 2.95 | -0.18 | 97800    |
| Pt3In1 | 2.05 | 1.13  | 99920    |
| Pt3Mg1 | 1.72 | 0.41  | 97509.25 |
| Pt3Mn1 | 1.93 | 0.65  | 97516.25 |
| Pt3Mo1 | 2.09 | -1.28 | 97610    |
| Pt3Nb1 | 2.66 | -1.50 | 97545    |
| Pt3Ni1 | 2.03 | 0.86  | 97519.25 |
| Pt3Pb1 | 2.53 | 1.14  | 97506.25 |
| Pt3Pd1 | 1.74 | 1.08  | 112082.5 |
| Pt3Ru1 | 1.73 | 0.57  | 101000   |
| Pt3Sc1 | 1.67 | -0.03 | 97850    |
| Pt3Sn1 | 2.56 | 1.08  | 97560    |
| Pt3Ta1 | 2.64 | -1.98 | 98625    |
| Pt3Ti1 | 2.92 | -0.35 | 97665.25 |
| Pt3Tl1 | 1.91 | 1.12  | 97620    |
| Pt3V1  | 2.47 | -1.17 | 98050    |
| Pt3W1  | 1.99 | -1.95 | 97527.5  |
| Pt3Y1  | 1.95 | 0.07  | 97607.5  |
| Pt3Zn1 | 1.92 | 0.97  | 97513.25 |
| Pt3Zr1 | 2.81 | -0.08 | 97892.5  |
| Re3Co1 | 1.15 | -1.37 | 12052.5  |
| Re3Cr1 | 1.13 | -1.70 | 12080    |
| Re3Fe1 | 1.17 | -1.36 | 12018    |
| Re3Ir1 | 1.19 | -1.47 | 22500    |
| Re3Mn1 | 1.02 | -1.40 | 12016.25 |
| Re3Mo1 | 0.94 | -1.61 | 12110    |
| Re3Nb1 | 0.63 | -1.82 | 12045    |
| Re3Ni1 | 1.20 | -1.61 | 12019.25 |
| Re3Os1 | 1.27 | -1.28 | 31250    |
| Re3Pt1 | 1.17 | -1.74 | 44500    |
| Re3Rh1 | 1.04 | -1.63 | 44500    |
| Re3Ru1 | 1.22 | -1.38 | 15500    |

|        |       |       |          |
|--------|-------|-------|----------|
| Re3Ta1 | 0.64  | -1.95 | 13125    |
| Re3Ti1 | 0.32  | -2.21 | 12165.25 |
| Re3V1  | 0.85  | -1.89 | 12550    |
| Re3W1  | 0.93  | -1.69 | 12027.5  |
| Rh3Al1 | 1.45  | -0.27 | 97539.5  |
| Rh3As1 | 0.96  | -0.25 | 98300    |
| Rh3Bi1 | 1.43  | 0.56  | 97597.5  |
| Rh3Cd1 | 1.10  | 0.05  | 97615    |
| Rh3Cr1 | 1.73  | -0.80 | 97580    |
| Rh3Ga1 | 1.52  | 0.31  | 98050    |
| Rh3Ge1 | 1.36  | 0.11  | 98400    |
| Rh3Hf1 | 0.94  | -0.89 | 97800    |
| Rh3In1 | 1.27  | 0.33  | 99920    |
| Rh3Ir1 | 1.54  | 0.25  | 108000   |
| Rh3La1 | 1.42  | -0.64 | 97700    |
| Rh3Mg1 | 1.03  | -0.11 | 97509.25 |
| Rh3Mn1 | 1.46  | -0.14 | 97516.25 |
| Rh3Mo1 | 1.85  | -0.77 | 97610    |
| Rh3Nb1 | 1.31  | -0.93 | 97545    |
| Rh3Ni1 | 1.83  | 0.22  | 97519.25 |
| Rh3Pb1 | 1.37  | 0.49  | 97506.25 |
| Rh3Pt1 | 1.65  | 0.18  | 130000   |
| Rh3Re1 | 1.56  | -0.96 | 101500   |
| Rh3Ru1 | 1.59  | -0.02 | 101000   |
| Rh3Sb1 | 1.57  | 0.65  | 97511.25 |
| Rh3Sc1 | 1.06  | -0.72 | 97850    |
| Rh3Si1 | 0.49  | -1.45 | 97513.5  |
| Rh3Sn1 | 1.49  | 0.55  | 97560    |
| Rh3Ta1 | 1.36  | -1.10 | 98625    |
| Rh3Ti1 | 1.19  | -0.91 | 97665.25 |
| Rh3V1  | 1.54  | -1.00 | 98050    |
| Rh3Zn1 | 1.41  | 0.19  | 97513.25 |
| Rh3Zr1 | 0.89  | -0.85 | 97892.5  |
| Ru3Al1 | 1.21  | -0.66 | 10539.5  |
| Ru3Cr1 | 1.41  | -1.24 | 10580    |
| Ru3Ga1 | 1.37  | -0.47 | 11050    |
| Ru3Ge1 | -0.19 | -2.14 | 11400    |
| Ru3Hf1 | 0.67  | -1.39 | 10800    |
| Ru3Ir1 | 1.40  | -0.58 | 21000    |
| Ru3Mn1 | 1.34  | -0.75 | 10516.25 |
| Ru3Mo1 | 1.11  | -1.14 | 10610    |
| Ru3Nb1 | 0.87  | -1.29 | 10545    |
| Ru3Os1 | 1.21  | -0.75 | 29750    |
| Ru3Pt1 | 1.30  | -0.64 | 43000    |
| Ru3Re1 | 1.34  | -1.10 | 14500    |
| Ru3Rh1 | 1.25  | -0.80 | 43000    |

|        |       |       |          |
|--------|-------|-------|----------|
| Ru3Sc1 | 0.36  | -1.75 | 10850    |
| Ru3Ta1 | 0.88  | -1.44 | 11625    |
| Ru3Ti1 | 1.00  | -1.37 | 10665.25 |
| Ru3V1  | 1.21  | -1.39 | 11050    |
| Ru3W1  | 1.15  | -1.24 | 10527.5  |
| Ru3Zr1 | 0.63  | -1.27 | 10892.5  |
| Sb3Ca1 | 4.10  | 0.76  | 83.75    |
| Sb3Sr1 | 4.23  | -0.07 | 283.75   |
| Sc3Ag1 | 1.08  | -5.70 | 1350     |
| Sc3Al1 | 1.62  | -4.05 | 1089.5   |
| Sc3As1 | 1.36  | -4.14 | 1850     |
| Sc3Au1 | -0.14 | -5.85 | 14900    |
| Sc3Bi1 | 0.92  | -4.22 | 1147.5   |
| Sc3Cd1 | 1.22  | -4.29 | 1165     |
| Sc3Ga1 | 1.58  | -4.11 | 1600     |
| Sc3Ge1 | 1.51  | -4.08 | 1950     |
| Sc3Hf1 | 1.21  | -4.09 | 1350     |
| Sc3Hg1 | 1.09  | -4.51 | 1170     |
| Sc3In1 | 1.27  | -4.21 | 3470     |
| Sc3Mg1 | 1.16  | -4.27 | 1059.25  |
| Sc3Mn1 | 1.37  | -4.14 | 1066.25  |
| Sc3Mo1 | 2.25  | -3.83 | 1160     |
| Sc3Nb1 | 1.08  | -3.73 | 1095     |
| Sc3P1  | 1.55  | -4.09 | 1125     |
| Sc3Pb1 | 1.03  | -4.23 | 1056.25  |
| Sc3Sb1 | 1.14  | -4.16 | 1061.25  |
| Sc3Si1 | 1.69  | -4.01 | 1063.5   |
| Sc3Sn1 | 1.23  | -4.14 | 1110     |
| Sc3Tl1 | 1.15  | -4.29 | 1170     |
| Sc3Y1  | 1.50  | -4.03 | 1157.5   |
| Sc3Zr1 | 1.36  | -3.93 | 1442.5   |
| Si3Ca1 | 2.72  | -1.12 | 90.5     |
| Si3Hf1 | 2.02  | -1.69 | 340.5    |
| Si3La1 | 3.10  | -0.87 | 240.5    |
| Si3Nb1 | 0.76  | -2.59 | 85.5     |
| Si3Sc1 | 2.67  | -1.59 | 390.5    |
| Si3Ta1 | 2.06  | -2.91 | 1165.5   |
| Si3V1  | 2.71  | -2.10 | 590.5    |
| Si3Y1  | 2.63  | -1.16 | 148      |
| Si3Zr1 | 1.53  | -1.97 | 433      |
| Sn3Ag1 | 4.42  | 0.26  | 480      |
| Sn3Ba1 | 4.17  | -0.38 | 317.5    |
| Sn3Bi1 | 3.73  | -0.36 | 277.5    |
| Sn3Ca1 | 4.13  | -0.50 | 230      |
| Sn3Cd1 | 4.34  | 0.13  | 295      |
| Sn3Ga1 | 4.17  | 0.01  | 730      |

|        |       |       |          |
|--------|-------|-------|----------|
| Sn3Ge1 | 3.78  | -0.02 | 1080     |
| Sn3Hf1 | 2.41  | -0.40 | 480      |
| Sn3In1 | 4.32  | 0.07  | 2600     |
| Sn3La1 | 3.79  | -0.56 | 380      |
| Sn3Mg1 | 3.91  | -0.74 | 189.25   |
| Sn3Pb1 | 4.16  | 0.07  | 186.25   |
| Sn3Sc1 | 3.66  | -0.82 | 530      |
| Sn3Sr1 | 4.31  | -0.40 | 430      |
| Sn3Tl1 | 4.31  | 0.07  | 300      |
| Sn3Y1  | 3.83  | -0.56 | 287.5    |
| Sn3Zr1 | 2.54  | -1.34 | 572.5    |
| Ta3Al1 | 0.92  | -2.87 | 3414.5   |
| Ta3As1 | -0.92 | -3.83 | 4175     |
| Ta3Au1 | 0.22  | -3.47 | 17225    |
| Ta3Co1 | -1.22 | -5.17 | 3427.5   |
| Ta3Cu1 | 0.51  | -3.53 | 3399.5   |
| Ta3Fe1 | -1.32 | -4.70 | 3393     |
| Ta3Ga1 | 0.89  | -3.14 | 3925     |
| Ta3Ge1 | 0.96  | -3.30 | 4275     |
| Ta3Hf1 | -1.26 | -4.59 | 3675     |
| Ta3In1 | 0.75  | -2.90 | 5795     |
| Ta3Ir1 | -0.45 | -4.30 | 13875    |
| Ta3Mn1 | 0.41  | -4.04 | 3391.25  |
| Ta3Mo1 | 0.91  | -2.96 | 3485     |
| Ta3Nb1 | 0.77  | -2.92 | 3420     |
| Ta3Ni1 | 0.27  | -3.67 | 3394.25  |
| Ta3Os1 | 0.58  | -3.02 | 22625    |
| Ta3Pd1 | 0.38  | -3.32 | 17957.5  |
| Ta3Pt1 | 0.54  | -3.37 | 35875    |
| Ta3Re1 | 0.68  | -2.97 | 7375     |
| Ta3Rh1 | -0.31 | -4.07 | 35875    |
| Ta3Ru1 | 0.86  | -3.86 | 6875     |
| Ta3Sb1 | 0.62  | -3.11 | 3386.25  |
| Ta3Si1 | 1.09  | -3.17 | 3388.5   |
| Ta3Sn1 | 0.87  | -2.88 | 3435     |
| Ta3Ti1 | 0.59  | -3.17 | 3540.25  |
| Ta3V1  | 0.90  | -2.93 | 3925     |
| Ta3W1  | 0.97  | -2.91 | 3402.5   |
| Ta3Zn1 | 0.54  | -3.25 | 3388.25  |
| Ti3Al1 | 1.11  | -3.75 | 535.25   |
| Ti3As1 | 1.41  | -3.52 | 1295.75  |
| Ti3Au1 | 1.04  | -3.91 | 14345.75 |
| Ti3Bi1 | 1.24  | -3.60 | 593.25   |
| Ti3Cd1 | 0.94  | -3.92 | 610.75   |
| Ti3Co1 | 1.23  | -3.54 | 548.25   |
| Ti3Cu1 | 1.30  | -3.78 | 520.25   |

|        |       |       |          |
|--------|-------|-------|----------|
| Ti3Fe1 | -0.81 | -6.27 | 513.75   |
| Ti3Ga1 | 1.12  | -3.78 | 1045.75  |
| Ti3Ge1 | 1.43  | -3.52 | 1395.75  |
| Ti3Hf1 | 0.86  | -3.71 | 795.75   |
| Ti3Hg1 | 0.94  | -3.94 | 615.75   |
| Ti3In1 | 0.85  | -3.86 | 2915.75  |
| Ti3Ir1 | 0.61  | -4.30 | 10995.75 |
| Ti3Mn1 | 0.39  | -4.73 | 512      |
| Ti3Mo1 | 1.14  | -3.90 | 605.75   |
| Ti3Nb1 | 0.85  | -3.83 | 540.75   |
| Ti3Ni1 | 0.21  | -4.85 | 515      |
| Ti3Os1 | 0.89  | -4.06 | 19745.75 |
| Ti3P1  | 1.47  | -3.51 | 570.75   |
| Ti3Pb1 | 1.08  | -3.63 | 502      |
| Ti3Pd1 | 0.70  | -4.16 | 15078.25 |
| Ti3Pt1 | 0.75  | -4.20 | 32995.75 |
| Ti3Re1 | -0.66 | -3.96 | 4495.75  |
| Ti3Rh1 | 0.93  | -3.96 | 32995.75 |
| Ti3Ru1 | 1.23  | -3.52 | 3995.75  |
| Ti3Sb1 | 1.36  | -3.52 | 507      |
| Ti3Si1 | 1.55  | -3.45 | 509.25   |
| Ti3Sn1 | 1.18  | -3.57 | 555.75   |
| Ti3Ta1 | 0.74  | -3.78 | 1620.75  |
| Ti3Tl1 | 0.77  | -3.91 | 615.75   |
| Ti3V1  | 0.73  | -3.85 | 1045.75  |
| Ti3W1  | 0.75  | -4.26 | 523.25   |
| Ti3Zn1 | 1.22  | -3.82 | 509      |
| Ti3Zr1 | 0.75  | -3.64 | 888.25   |
| Tl3As1 | 3.68  | 0.30  | 1160     |
| Tl3Ba1 | 4.78  | -0.33 | 497.5    |
| Tl3Bi1 | 5.13  | 0.86  | 457.5    |
| Tl3Ca1 | 5.52  | -0.45 | 410      |
| Tl3Cd1 | 5.52  | 0.64  | 475      |
| Tl3Hg1 | 5.37  | 0.59  | 480      |
| Tl3La1 | 4.30  | -1.07 | 560      |
| Tl3Pb1 | 5.30  | 0.81  | 366.25   |
| Tl3Sb1 | 4.67  | 0.56  | 371.25   |
| Tl3Sc1 | 5.91  | -1.11 | 710      |
| Tl3Sn1 | 6.05  | 0.43  | 420      |
| Tl3Y1  | 5.74  | -0.85 | 467.5    |
| V3Al1  | 1.14  | -2.73 | 1689.5   |
| V3As1  | 1.28  | -2.91 | 2450     |
| V3Co1  | 0.10  | -4.26 | 1702.5   |
| V3Cu1  | 1.12  | -3.40 | 1674.5   |
| V3Ge1  | 1.46  | -2.71 | 2550     |
| V3In1  | 1.00  | -2.80 | 4070     |

|        |       |       |         |
|--------|-------|-------|---------|
| V3Mn1  | -2.01 | -6.34 | 1666.25 |
| V3Nb1  | -2.45 | -7.74 | 1695    |
| V3Ni1  | 0.57  | -3.39 | 1669.25 |
| V3Os1  | -1.08 | -5.60 | 20900   |
| V3P1   | 1.43  | -2.92 | 1725    |
| V3Pd1  | 0.20  | -3.84 | 16232.5 |
| V3Pt1  | 0.39  | -3.74 | 34150   |
| V3Sb1  | 1.27  | -2.70 | 1661.25 |
| V3Si1  | 1.59  | -2.69 | 1663.5  |
| V3Sn1  | 1.23  | -2.64 | 1710    |
| V3Zn1  | 0.76  | -3.22 | 1663.25 |
| W3Al1  | 1.23  | -1.96 | 122     |
| W3Au1  | 0.62  | -2.48 | 13932.5 |
| W3Co1  | 0.92  | -2.23 | 135     |
| W3Cr1  | -3.85 | -5.15 | 162.5   |
| W3Cu1  | 0.63  | -2.37 | 107     |
| W3Fe1  | -0.07 | -2.65 | 100.5   |
| W3Ga1  | 1.21  | -1.99 | 632.5   |
| W3Ge1  | 1.30  | -2.07 | 982.5   |
| W3Ir1  | 1.03  | -2.19 | 10582.5 |
| W3Mn1  | 0.22  | -3.01 | 98.75   |
| W3Ni1  | 0.78  | -2.36 | 101.75  |
| W3Os1  | 0.95  | -2.20 | 19332.5 |
| W3Pd1  | 0.64  | -2.41 | 14665   |
| W3Pt1  | 0.84  | -2.29 | 32582.5 |
| W3Re1  | -0.02 | -2.54 | 4082.5  |
| W3Rh1  | 0.89  | -2.28 | 32582.5 |
| W3Ru1  | 0.82  | -2.40 | 3582.5  |
| W3Si1  | 1.26  | -2.05 | 96      |
| W3Ta1  | -2.52 | -2.35 | 1207.5  |
| W3Ti1  | -4.26 | -6.23 | 247.75  |
| W3V1   | -1.96 | -4.27 | 632.5   |
| W3Zn1  | 0.77  | -2.15 | 95.75   |
| Y3Al1  | 2.04  | -3.86 | 362     |
| Y3Bi1  | 1.43  | -3.99 | 420     |
| Y3Ga1  | 1.98  | -3.90 | 872.5   |
| Y3Ge1  | 1.92  | -3.87 | 1222.5  |
| Y3Hg1  | 0.77  | -4.92 | 442.5   |
| Y3In1  | 1.76  | -3.98 | 2742.5  |
| Y3Mg1  | 1.65  | -3.99 | 331.75  |
| Y3Pb1  | 1.53  | -4.01 | 328.75  |
| Y3Sb1  | 1.63  | -3.94 | 333.75  |
| Y3Sc1  | 1.73  | -3.94 | 672.5   |
| Y3Sn1  | 1.72  | -3.93 | 382.5   |
| Y3Tl1  | 1.63  | -4.04 | 442.5   |
| Zn3Al1 | 3.85  | -1.15 | 79.25   |

|        |      |       |          |
|--------|------|-------|----------|
| Zn3Au1 | 4.61 | -0.30 | 13889.75 |
| Zn3Co1 | 4.99 | 0.20  | 92.25    |
| Zn3Cr1 | 2.00 | -1.45 | 119.75   |
| Zn3Cu1 | 4.53 | 0.02  | 64.25    |
| Zn3Fe1 | 2.71 | -0.45 | 57.75    |
| Zn3Ga1 | 4.11 | -0.46 | 589.75   |
| Zn3Ge1 | 3.98 | -0.54 | 939.75   |
| Zn3Hf1 | 2.70 | -2.26 | 339.75   |
| Zn3Ir1 | 5.09 | 0.28  | 10539.75 |
| Zn3Mn1 | 3.08 | -0.38 | 56       |
| Zn3Mo1 | 1.95 | -1.43 | 149.75   |
| Zn3Nb1 | 2.23 | -1.91 | 84.75    |
| Zn3Ni1 | 4.81 | 0.21  | 59       |
| Zn3Pd1 | 4.61 | -0.08 | 14622.25 |
| Zn3Pt1 | 4.18 | 0.04  | 32539.75 |
| Zn3Rh1 | 3.69 | 0.23  | 32539.75 |
| Zn3Ru1 | 3.03 | 0.23  | 3539.75  |
| Zn3Sc1 | 3.17 | -1.70 | 389.75   |
| Zn3Si1 | 3.29 | -0.75 | 53.25    |
| Zn3Ta1 | 1.92 | -2.40 | 1164.75  |
| Zn3Ti1 | 2.80 | -1.95 | 205      |
| Zn3V1  | 2.17 | -1.98 | 589.75   |
| Zn3W1  | 1.70 | -1.97 | 67.25    |
| Zn3Zr1 | 2.79 | -1.81 | 432.25   |
| Zr3Ag1 | 1.15 | -3.66 | 1477.5   |
| Zr3Al1 | 1.25 | -3.58 | 1217     |
| Zr3As1 | 1.27 | -3.58 | 1977.5   |
| Zr3Au1 | 1.13 | -3.71 | 15027.5  |
| Zr3Bi1 | 1.27 | -3.45 | 1275     |
| Zr3Cd1 | 1.10 | -3.72 | 1292.5   |
| Zr3Cu1 | 1.30 | -3.68 | 1202     |
| Zr3Ga1 | 1.20 | -3.59 | 1727.5   |
| Zr3Ge1 | 1.39 | -3.41 | 2077.5   |
| Zr3Hf1 | 1.02 | -3.74 | 1477.5   |
| Zr3Hg1 | 1.07 | -3.76 | 1297.5   |
| Zr3In1 | 0.96 | -3.70 | 3597.5   |
| Zr3Mg1 | 1.18 | -3.60 | 1186.75  |
| Zr3Nb1 | 1.31 | -3.59 | 1222.5   |
| Zr3Pb1 | 1.21 | -3.47 | 1183.75  |
| Zr3Pd1 | 0.37 | -4.41 | 15760    |
| Zr3Pt1 | 0.17 | -4.75 | 33677.5  |
| Zr3Sb1 | 1.35 | -3.40 | 1188.75  |
| Zr3Sc1 | 1.19 | -3.56 | 1527.5   |
| Zr3Si1 | 1.49 | -1.73 | 1191     |
| Zr3Sn1 | 1.32 | -3.43 | 1237.5   |
| Zr3Ti1 | 1.03 | -3.59 | 1342.75  |



|        |       |       |         |
|--------|-------|-------|---------|
| Zr3Ti1 | 0.85  | -3.76 | 1297.5  |
| Zr3Zn1 | 1.33  | -3.60 | 1190.75 |
| Ag1Au1 | 4.42  | 1.78  | 28300   |
| Ag1Hf1 | 1.15  | -3.51 | 1200    |
| Ag1Pd1 | 3.00  | 1.45  | 29765   |
| Ag1Sb1 | 2.53  | -0.69 | 622.5   |
| Al1Co1 | 2.00  | -0.95 | 184     |
| Al1Nb1 | -1.07 | -3.98 | 169     |
| Al1Rh1 | 3.05  | -0.86 | 65079   |
| As1Cr1 | 2.54  | -0.28 | 1760    |
| As1Hf1 | 2.23  | -2.53 | 2200    |
| As1Mn1 | 2.13  | -0.33 | 1632.5  |
| As1Mo1 | 2.3   | -0.57 | 1820    |
| As1Nb1 | 2.43  | -0.55 | 1690    |
| As1Ni1 | 2.64  | -0.23 | 1638.5  |
| As1Rh1 | 3.24  | 0.73  | 66600   |
| As1Ta1 | 2.05  | -1.34 | 3850    |
| As1V1  | 2.62  | -0.62 | 2700    |
| As1W1  | 2.02  | -0.92 | 1655    |
| As1Zr1 | 2.58  | -1.98 | 2385    |
| Au1Ca1 | 4.2   | -1.46 | 27800   |
| Au1Cd1 | 5.08  | 1.21  | 27930   |
| Au1Cu1 | 3.98  | 1.3   | 27749   |
| Au1Hf1 | 1.46  | -3.48 | 28300   |
| Au1La1 | 2.82  | -2.98 | 28100   |
| Au1Mg1 | 4.83  | -0.43 | 27718.5 |
| Au1Mn1 | 2.91  | -0.38 | 27732.5 |
| Au1Ni1 | 2.29  | 0.56  | 27738.5 |
| Au1Pd1 | 2.89  | 1.79  | 56865   |
| Au1Pt1 | 1.86  | 1.05  | 92700   |
| Au1Sc1 | 2.73  | -2.93 | 28400   |
| Au1Sn1 | 3.6   | 0.23  | 27820   |
| Au1Ti1 | 1.51  | -2.86 | 28030.5 |
| Au1Tl1 | 4.82  | 1.29  | 27940   |
| Au1Y1  | 3.07  | -2.78 | 27915   |
| Au1Zr1 | 1.62  | -3.09 | 28485   |
| Bi1Ti1 | 2.34  | -2.87 | 525.5   |
| Bi1Zn1 | 3.01  | -0.66 | 221.5   |
| Cd1Hf1 | 1.16  | -3.58 | 830     |
| Cd1Pd1 | 4.03  | 1.21  | 29395   |
| Cd1Ti1 | 1.14  | -3.28 | 560.5   |
| Co1Fe1 | 1.66  | -0.8  | 141     |
| Co1Ga1 | 2.57  | 0.05  | 1205    |
| Co1Ge1 | 3.28  | 0.44  | 1905    |
| Co1Hf1 | 2.04  | -2.92 | 705     |
| Co1In1 | 3.55  | -0.12 | 4945    |

|       |       |       |       |
|-------|-------|-------|-------|
| CoIr1 | -0.28 | -1.17 | 21105 |
| CoMn1 | 1.17  | -1.25 | 137.5 |
| CoNb1 | 1.19  | -2.42 | 195   |
| CoNi1 | 1.42  | -1.41 | 143.5 |
| CoOs1 | 0.27  | -1.82 | 38605 |
| CoPt1 | 0.89  | -0.41 | 65105 |
| CoRu1 | -0.71 | -2.22 | 7105  |
| CoSc1 | 2.29  | -2.42 | 805   |
| CoSi1 | 3.24  | -0.15 | 132   |
| CoSn1 | 4.09  | 0.41  | 225   |
| CoTa1 | 0.89  | -2.73 | 2355  |
| CoTi1 | 1.93  | -2.74 | 435.5 |
| CoV1  | 1.31  | -2.46 | 1205  |
| CoY1  | 2.09  | -2.37 | 320   |
| CoZn1 | 1.9   | -0.27 | 131.5 |
| CoZr1 | 2.04  | -2.61 | 890   |
| CrIr1 | -1.87 | -3.93 | 21160 |
| CrMo1 | 0.9   | -2.12 | 380   |
| CrNb1 | 1.65  | -2.43 | 250   |
| CrOs1 | -1.18 | -2.91 | 38660 |
| CrP1  | 2.26  | -0.76 | 310   |
| CrRe1 | 0.5   | -1.63 | 8160  |
| CrRu1 | -0.76 | -3.39 | 7160  |
| CrTa1 | 1.47  | -2.55 | 2410  |
| CrTi1 | 1.57  | -2.89 | 490.5 |
| CrW1  | 0.7   | -2.27 | 215   |
| CuHf1 | 1.63  | -3.44 | 649   |
| CuIr1 | 0.11  | -0.88 | 21049 |
| CuMn1 | 2.22  | -0.87 | 81.5  |
| CuNi1 | 1.68  | -0.1  | 87.5  |
| CuPd1 | 2.69  | 1.01  | 29214 |
| CuPt1 | 1.72  | 0.92  | 65049 |
| CuRh1 | 1.09  | 0.21  | 65049 |
| CuSc1 | 2.54  | -2.91 | 749   |
| CuY1  | 2.73  | -2.69 | 264   |
| CuZr1 | 1.89  | -2.95 | 834   |
| FeGa1 | 2.4   | -0.22 | 1136  |
| FeGe1 | 2.94  | 0.14  | 1836  |
| FeHf1 | 0.7   | -2.76 | 636   |
| FeIr1 | 1.16  | -0.45 | 21036 |
| FeMn1 | 1.11  | -1.76 | 68.5  |
| FeNb1 | 1.49  | -2.55 | 126   |
| FeNi1 | 1.49  | -1.37 | 74.5  |
| FeOs1 | 0.73  | -1.64 | 38536 |
| FePt1 | 1.6   | -1.24 | 65036 |
| FeRe1 | -0.4  | -2.15 | 8036  |

|        |       |       |        |
|--------|-------|-------|--------|
| Fe1Rh1 | 1.7   | -0.5  | 65036  |
| Fe1Ru1 | 0.97  | -0.86 | 7036   |
| Fe1Sc1 | 1.72  | -3.23 | 736    |
| Fe1Si1 | 2.62  | -0.5  | 63     |
| Fe1Ta1 | 1.44  | -2.77 | 2286   |
| Fe1Ti1 | 0.82  | -2.59 | 366.5  |
| Fe1Zn1 | 2.04  | -1.15 | 62.5   |
| Fe1Zr1 | 2.02  | -2.45 | 821    |
| Ga1Hf1 | 1.19  | -3.54 | 1700   |
| Ga1Mn1 | 2.29  | -0.81 | 1132.5 |
| Ga1Nb1 | 0.21  | -3.19 | 1190   |
| Ga1Ni1 | 3.17  | 0.44  | 1138.5 |
| Ga1Os1 | 1.47  | -0.26 | 39600  |
| Ga1Pt1 | 3.57  | 0.46  | 66100  |
| Ga1Ru1 | 2.62  | -0.02 | 8100   |
| Ga1Sc1 | 2.67  | -2.77 | 1800   |
| Ga1Ti1 | 1.02  | -3.1  | 1430.5 |
| Ga1V1  | -0.05 | -3.36 | 2200   |
| Ga1Zr1 | 1.4   | -3    | 1885   |
| Ge1Ir1 | 2.74  | 0.43  | 22800  |
| Ge1Mn1 | 3.14  | 0.18  | 1832.5 |
| Ge1Mo1 | 2.17  | -0.72 | 2020   |
| Ge1Nb1 | 2.13  | -1.28 | 1890   |
| Ge1Pd1 | 4.12  | 0.4   | 30965  |
| Ge1Pt1 | 1.73  | -1.87 | 66800  |
| Ge1Re1 | 1.65  | -0.46 | 9800   |
| Ge1Rh1 | 3.54  | 0.61  | 66800  |
| Ge1Ru1 | 2.58  | 0.28  | 8800   |
| Ge1Ta1 | 1.88  | -1.84 | 4050   |
| Ge1Ti1 | 1.12  | -3.77 | 2130.5 |
| Ge1V1  | 1.58  | -2.31 | 2900   |
| Ge1Zn1 | 1.2   | -1.49 | 1826.5 |
| Hf1Hg1 | 1.43  | -3.5  | 840    |
| Hf1In1 | 0.38  | -4    | 5440   |
| Hf1Ir1 | 1.98  | -2.64 | 21600  |
| Hf1Mn1 | 1.73  | -2.95 | 632.5  |
| Hf1Ni1 | 1.79  | -3.09 | 638.5  |
| Hf1Os1 | 0.85  | -2.51 | 39100  |
| Hf1Pd1 | 1.51  | -3.52 | 29765  |
| Hf1Pt1 | 1.44  | -3.43 | 65600  |
| Hf1Re1 | 1.52  | -2.37 | 8600   |
| Hf1Rh1 | 1.94  | -2.95 | 65600  |
| Hf1Ru1 | 1.43  | -2.71 | 7600   |
| Hf1Sb1 | 2.19  | -2.23 | 622.5  |
| Hf1Sn1 | 0.86  | -3.99 | 720    |
| Hf1Zn1 | 1.57  | -3.34 | 626.5  |

|        |       |       |         |
|--------|-------|-------|---------|
| Hg1Pd1 | 4.36  | 1.91  | 29405   |
| Hg1Pt1 | 2.58  | 1.43  | 65240   |
| Hg1Rh1 | 1.69  | 0.76  | 65240   |
| Hg1Zr1 | 1.75  | -3    | 1025    |
| In1Ir1 | 3.33  | 0.8   | 25840   |
| In1Pd1 | 4.87  | 1     | 34005   |
| In1Pt1 | 3.57  | 0.9   | 69840   |
| In1Rh1 | 3.18  | 0.82  | 69840   |
| In1Ru1 | 1.23  | -0.12 | 11840   |
| In1Ti1 | 0.78  | -3.35 | 5170.5  |
| Ir1Mg1 | 0.63  | -0.96 | 21018.5 |
| Ir1Mn1 | 1.34  | -0.82 | 21032.5 |
| Ir1Ni1 | 0.4   | -0.38 | 21038.5 |
| Ir1Ru1 | -3.24 | -4.63 | 28000   |
| Ir1Ti1 | 1.76  | -2.35 | 21330.5 |
| Ir1Y1  | 2.67  | -1.73 | 21215   |
| Ir1Zn1 | 1.18  | 0.25  | 21026.5 |
| Ir1Zr1 | 1.96  | -2.37 | 21785   |
| Mg1Pd1 | 3.5   | -0.6  | 29183.5 |
| Mg1Pt1 | 2.85  | -0.31 | 65018.5 |
| Mg1Rh1 | 1.36  | -0.48 | 65018.5 |
| Mg1Sb1 | 1.47  | -2.18 | 41      |
| Mn1Os1 | 1.01  | -1.3  | 38532.5 |
| Mn1P1  | 2.83  | -0.28 | 182.5   |
| Mn1Ru1 | 1.44  | -1.14 | 7032.5  |
| Mn1Si1 | 2.49  | -0.93 | 59.5    |
| Mn1Ta1 | 0.72  | -2.6  | 2282.5  |
| Mn1Ti1 | 0.73  | -2.73 | 363     |
| Mn1V1  | 1.53  | -2.43 | 1132.5  |
| Mn1W1  | 0.7   | -2.43 | 87.5    |
| Mn1Zn1 | 2.03  | -1.01 | 59      |
| Mn1Zr1 | 1.97  | -2.68 | 817.5   |
| Mo1Si1 | 1.31  | -1.6  | 247     |
| Mo1Ta1 | 1.51  | -2.41 | 2470    |
| Mo1V1  | 1.37  | -2.38 | 1320    |
| Mo1W1  | 0.87  | -2.03 | 275     |
| Mo1Zr1 | 1.71  | -2.47 | 1005    |
| Nb1Os1 | 1.17  | -2.27 | 38590   |
| Nb1P1  | 2.05  | -1.04 | 240     |
| Nb1Re1 | 0.63  | -2.18 | 8090    |
| Nb1Rh1 | 0.99  | -4.17 | 65090   |
| Nb1Si1 | -1.3  | -3.95 | 117     |
| Nb1Sn1 | 1.88  | -1.56 | 210     |
| Ni1Os1 | -0.65 | -1.82 | 38538.5 |
| Ni1P1  | -0.34 | -1.74 | 188.5   |
| Ni1Pt1 | 1.35  | 0.18  | 65038.5 |

|        |       |       |         |
|--------|-------|-------|---------|
| Ni1Rh1 | 1.2   | -0.06 | 65038.5 |
| Ni1Sc1 | 2.56  | -2.56 | 738.5   |
| Ni1Si1 | 3.15  | -0.37 | 65.5    |
| Ni1Sn1 | 2.86  | 0.62  | 158.5   |
| Ni1Y1  | 2.6   | -2.38 | 253.5   |
| Ni1Zn1 | 2.72  | 0.21  | 65      |
| Ni1Zr1 | 1.87  | -2.66 | 823.5   |
| Os1P1  | 1.29  | -0.76 | 38650   |
| Os1Rh1 | -2.29 | -3.65 | 103500  |
| Os1Ru1 | -3.39 | -4.79 | 45500   |
| Os1Sb1 | 3.67  | 0.72  | 38522.5 |
| Os1Sc1 | 1.81  | -1.7  | 39200   |
| Os1Si1 | 2.25  | -0.16 | 38527   |
| Os1Sn1 | 3.04  | 0.6   | 38620   |
| Os1Ta1 | 1.07  | -2.47 | 40750   |
| Os1Ti1 | 0.92  | -2.34 | 38830.5 |
| Os1V1  | 1     | -2.19 | 39600   |
| Os1Y1  | 0.61  | -2.78 | 38715   |
| Os1Zr1 | 0.77  | -2.33 | 39285   |
| P1Re1  | 1.09  | 0.31  | 8150    |
| P1Ru1  | 2.1   | -0.38 | 7150    |
| P1Sc1  | -2.79 | -5.32 | 850     |
| P1Ta1  | 1.68  | -1.19 | 2400    |
| P1Ti1  | 0.12  | -2.37 | 480.5   |
| P1V1   | 2.26  | -1.12 | 1250    |
| P1W1   | 1.67  | -0.66 | 205     |
| P1Y1   | -2.4  | -5.12 | 365     |
| P1Zr1  | 2.25  | -2.08 | 935     |
| Pb1Pd1 | 4.13  | 1.25  | 29177.5 |
| Pb1Pt1 | 2.81  | 0.49  | 65012.5 |
| Pb1Rh1 | 2.27  | 0.91  | 65012.5 |
| Pb1Ru1 | 2.26  | 0.38  | 7012.5  |
| Pd1Rh1 | 1.04  | -0.62 | 94165   |
| Pd1Sc1 | 2.72  | -2.69 | 29865   |
| Pd1Ti1 | 0.7   | -3.13 | 29495.5 |
| Pd1Y1  | 2.97  | -2.51 | 29380   |
| Pd1Zn1 | 3.88  | 0.62  | 29191.5 |
| Pd1Zr1 | 1.65  | -3.08 | 29950   |
| Pt1Rh1 | 0.51  | -0.57 | 130000  |
| Pt1Ru1 | 0.97  | -2.35 | 72000   |
| Pt1Sc1 | 2.79  | -2.21 | 65700   |
| Pt1Sn1 | 2.44  | -0.68 | 65120   |
| Pt1Sr1 | 2.73  | -0.55 | 65500   |
| Pt1Ta1 | -0.54 | -4.19 | 67250   |
| Pt1Ti1 | 0.97  | -3.08 | 65330.5 |
| Pt1Tl1 | 1.1   | -0.67 | 65240   |

|        |       |       |         |
|--------|-------|-------|---------|
| Pt1Zn1 | 3.55  | 0.82  | 65026.5 |
| Pt1Zr1 | 1.62  | -2.91 | 65785   |
| Re1Si1 | 1.51  | -0.42 | 8027    |
| Re1Ta1 | 0.58  | -1.55 | 10250   |
| Rh1Ru1 | -1.48 | -2.75 | 72000   |
| Rh1Sb1 | 3.5   | 0.7   | 65022.5 |
| Rh1Sc1 | 2.14  | -2.3  | 65700   |
| Rh1Si1 | 3.55  | -0.83 | 65027   |
| Rh1Sn1 | 3.63  | 0.76  | 65120   |
| Rh1Ti1 | 1.73  | -2.65 | 65330.5 |
| Rh1Tl1 | 2.7   | 0.96  | 65240   |
| Rh1Y1  | 3.04  | -2.1  | 65215   |
| Rh1Zn1 | 1.77  | 0.45  | 65026.5 |
| Ru1Si1 | 2.84  | -0.26 | 7027    |
| Ru1Sn1 | 2.76  | 0.7   | 7120    |
| Ru1Ta1 | 0.97  | -2.72 | 9250    |
| Ru1Zr1 | 2.29  | -2.5  | 7785    |
| Sb1Ta1 | 2.09  | -1.33 | 2272.5  |
| Sb1V1  | 2.49  | -1.04 | 1122.5  |
| Sb1Zn1 | 0.98  | -2.15 | 49      |
| Sb1Zr1 | 2.51  | -1.7  | 807.5   |
| Si1W1  | 1.35  | -1.58 | 82      |
| Sn1Ti1 | 0.95  | -3.08 | 450.5   |
| Sn1Zr1 | 0.82  | -3.42 | 905     |
| Ti1Zn1 | 1.36  | -3.07 | 357     |
| V1W1   | 0.9   | -2.34 | 1155    |
| Zn1Zr1 | 1.77  | -2.88 | 811.5   |

---

## 7. Scaling relationships on interface

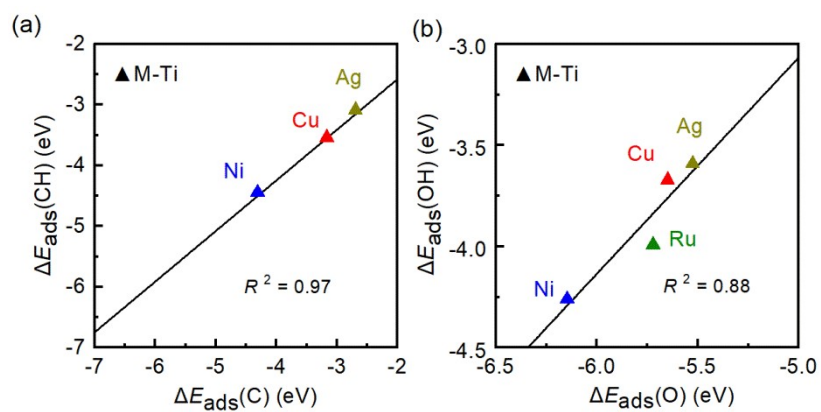

**Figure S4** Scaling relationships between adsorption energies of (a) C and CH, (b) O and OH on interface (M-Ti).
